# Supplementary material for: Colorimetric detection of hypochlorite based on the morphological changes of silver nanoprisms to spherical nanoparticles
Source: Royal Society of Chemistry journal article supplement (doi:10.1039/c7ay00716g), 2017-01-01
Supplement: c7ay00716g1.pdf [file c7ay00716g1.pdf]

## **SUPPORTING INFORMATION**

### **COLORIMETRIC DETECTION OF HYPOCHLORITE BASED ON THE MORPHOLOGICAL CHANGES OF SILVER NANOPRISMS TO SPHERICAL NANOPARTICLES**

Thangarasu Sasikumar and Malaichamy Ilanchelian\*

Department of chemistry,  
Bharathiar University, Coimbatore – 641 046, Tamil Nadu, India

Corresponding author E-mail: [chemsasi16@gmail.com](mailto:chemsasi16@gmail.com), [chelian73@yahoo.com](mailto:chelian73@yahoo.com)\*

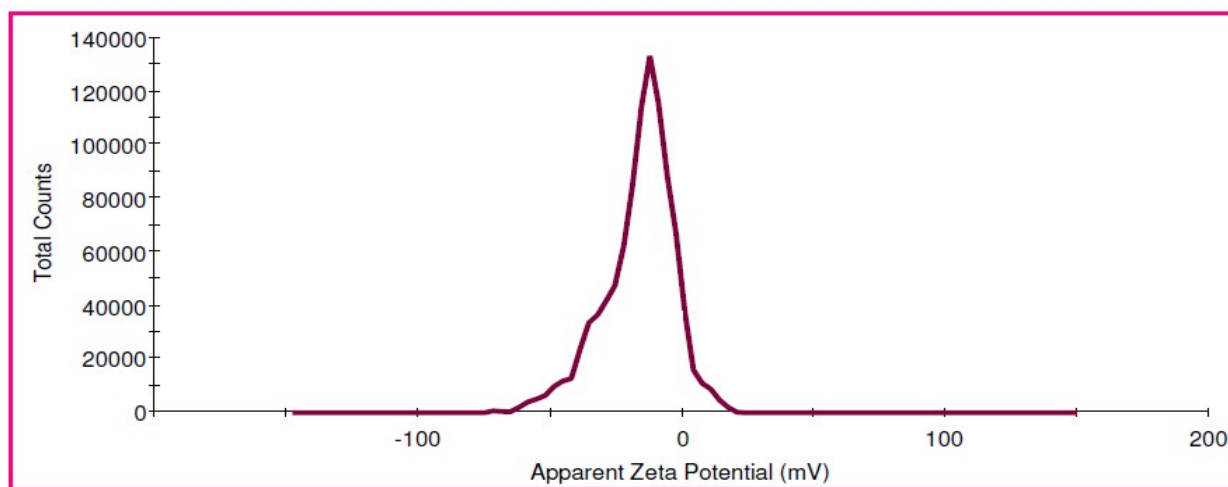

**Fig. S1.** Zeta potential measurement of AgNPRs.

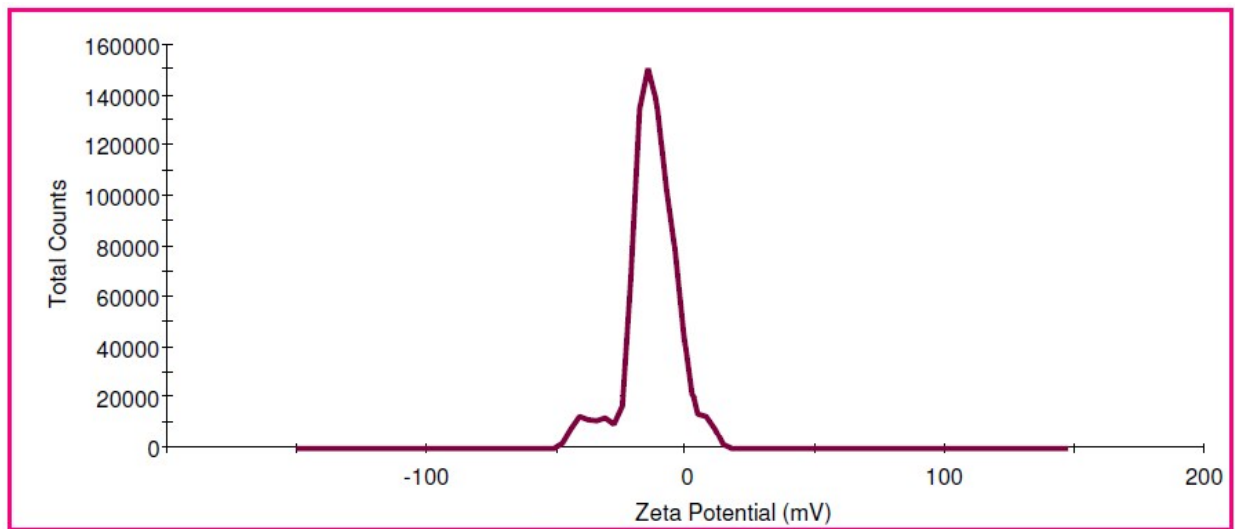

**Fig. S2.** Zeta potential measurement of AgNPRs in the presence of  $\text{ClO}^-$ .
